# Supplementary material for: TET1 may contribute to hypoxia-induced epithelial to mesenchymal transition of endometrial epithelial cells in endometriosis
Source: PeerJ journal article supplement (doi:10.7717/peerj.9950), 2020-09-15

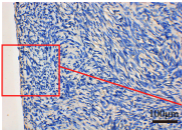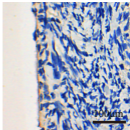

Supplement: supplementary_figure_1.pdf [file supplementary_figure_1.pdf]
