# Supplementary material for: TET1 may contribute to hypoxia-induced epithelial to mesenchymal transition of endometrial epithelial cells in endometriosis
Source: PeerJ. 2020 Sep 15;8:e9950. doi: 10.7717/peerj.9950 (PMC7500323; doi:10.7717/peerj.9950)
Supplement: Table S5 — The raw data for figure 4 showing the three times western blotting analyses. These results suggest that TET1 overexpression may promote EMT and knockdown of TET1 mitigates hypoxia-induced EMT in ISK cells. [file peerj-08-9950-s007.csv]

Supplementary Table 5. TET1 overexpression may promote EMT and knockdown of TET1 mitigates hypoxia-induced EMT in ISK cells (raw data for figure 4).
	normaxia+NC	normaxia+TET	hypoxia+si-NC	hypoxia+si-TET
E-cadherin/actin	0.49	0.13	0.34	0.53
	0.42	0.1	0.28	0.45
	0.53	0.15	0.37	0.54
HIF1¦Á/actin	0.07	0.46	0.51	0.25
	0.05	0.45	0.5	0.23
	0.1	0.5	0.53	0.229
HIF2¦Á/actin	0.16	0.51	0.67	0.4
	0.14	0.48	0.64	0.35
	0.17	0.5	0.67	0.43
TET1/actin	0.07	0.61	0.37	0.2
	0.09	0.64	0.4	0.21
	0.06	0.59	0.33	0.18
Vimentin/actin	0.18	0.33	0.39	0.23
	0.14	0.25	0.36	0.21
	0.25	0.38	0.44	0.3
	0.29	0.14	0.28	0.1
	0.27	0.17	0.35	0.15
