# Supplementary material for: TET1 may contribute to hypoxia-induced epithelial to mesenchymal transition of endometrial epithelial cells in endometriosis
Source: PeerJ. 2020 Sep 15;8:e9950. doi: 10.7717/peerj.9950 (PMC7500323; doi:10.7717/peerj.9950)
Supplement: Table S6 — The raw data of figure 5 showing three times of western blotting. The raw data is used for statistical analysis showing that knockdown of HIF-2α inhibits hypoxia-induced EMT and TET1 expression. [file peerj-08-9950-s008.csv]

Supplementary Table 6. Knockdown of HIF-2¦Á inhibits hypoxia-induced EMT and TET1 expression (raw data for figure 5).
	normxia	normxia+si-NC	hypoxia	hypoxia+si-NC	hypoxia+si-HIF-2a
HIF2¦Á/actin	0.1	0.11	0.27	0.3	0.14
	0.09	0.12	0.21	0.23	0.09
	0.08	0.1	0.26	0.3	0.11
TET1/actin	0.12	0.14	0.27	0.28	0.15
	0.14	0.17	0.32	0.28	0.2
	0.13	0.18	0.35	0.34	0.17
Vimentin/actin	0.19	0.19	0.41	0.42	0.2
	0.21	0.2	0.37	0.38	0.21
	0.18	0.18	0.38	0.4	0.23
E-cadherin/actin	0.34	0.31	0.1	0.1	0.4
	0.32	0.3	0.13	0.07	0.32
	0.35	0.32	0.11	0.09	0.39
	0.14	0.25	0.36	0.21
	0.25	0.38	0.44	0.3
	0.29	0.14	0.28	0.1
	0.27	0.17	0.35	0.15
